# Supplementary material for: Electrospun three-layered polymer nanofiber-based porous carbon nanotubes for high-capacity energy storage
Source: Royal Society of Chemistry journal article supplement (doi:10.1039/c6ra24870e), 2016-12-24
Supplement: c6ra24870e1.pdf [file c6ra24870e1.pdf]

Electronic Supplementary Information (ESI) for

## **Electrospun Three-Layered Polymer Nanofiber-Based Porous Carbon Nanotubes for High-Capacity Energy Storage**

Jun Seop Lee,<sup>a,b,II</sup> Jaemoon Jun,<sup>a,II</sup> Sunghun Cho,<sup>c</sup> Wooyoung Kim<sup>a</sup>, and Jyongsik Jang<sup>a\*</sup>

<sup>a</sup> *School of Chemical and Biological Engineering, College of Engineering, Seoul National University (SNU), 599 Gwanangno, Gwanak-gu, Seoul, 151-742 (Korea). Fax: +82-2-888-7295; Tel: 82-2-880-8348; e-mail: [jsjang@plaza.snu.ac.kr](mailto:jsjang@plaza.snu.ac.kr)*

<sup>b</sup> *Materials Science and Engineering Program and Texas Materials Institute, The University of Texas at Austin, Austin, TX 78712, (USA)*

<sup>c</sup> *School of Chemical Engineering, Yeungnam University, 280 Daehak-Ro, Gyeongsan 38541, Korea*

<sup>II</sup> These authors contributed equally to this work.

## 1. Apparatus of dual-nozzle co-electrospinning.

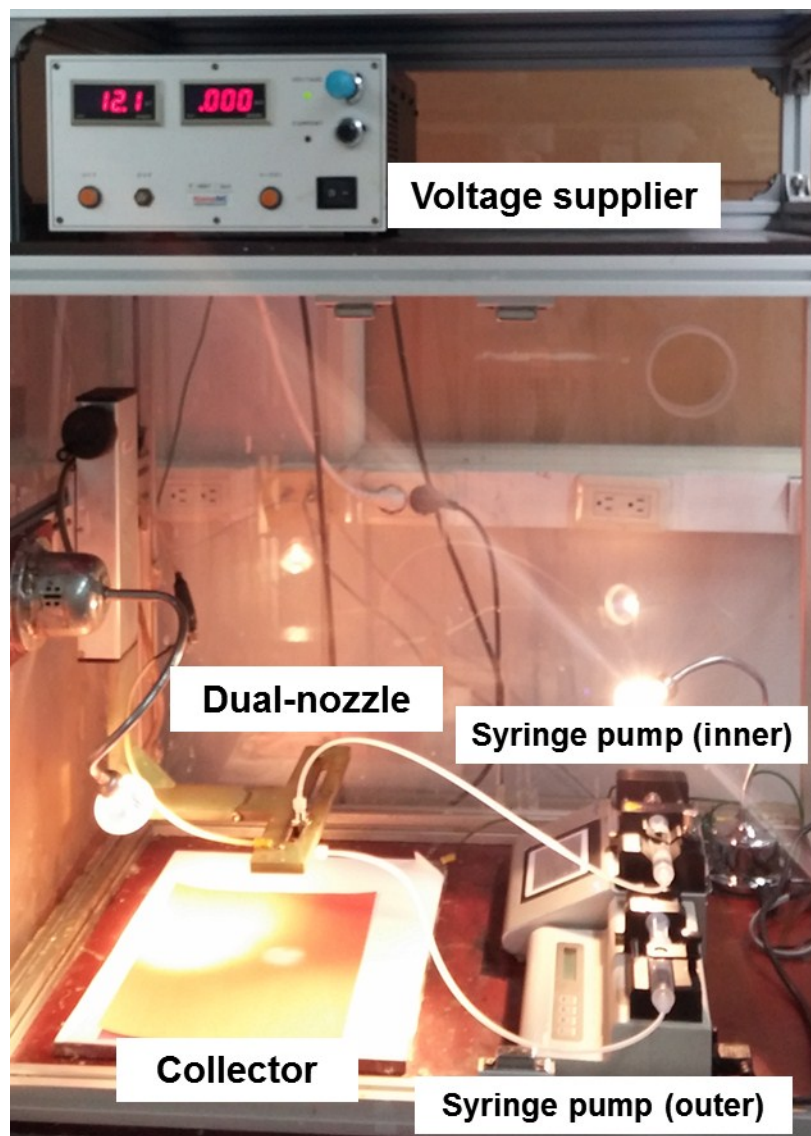

**Figure S1.** Real-photo image of dual-nozzle co-electrospinning apparatus.

## 2. CV curves of other PCNTs.

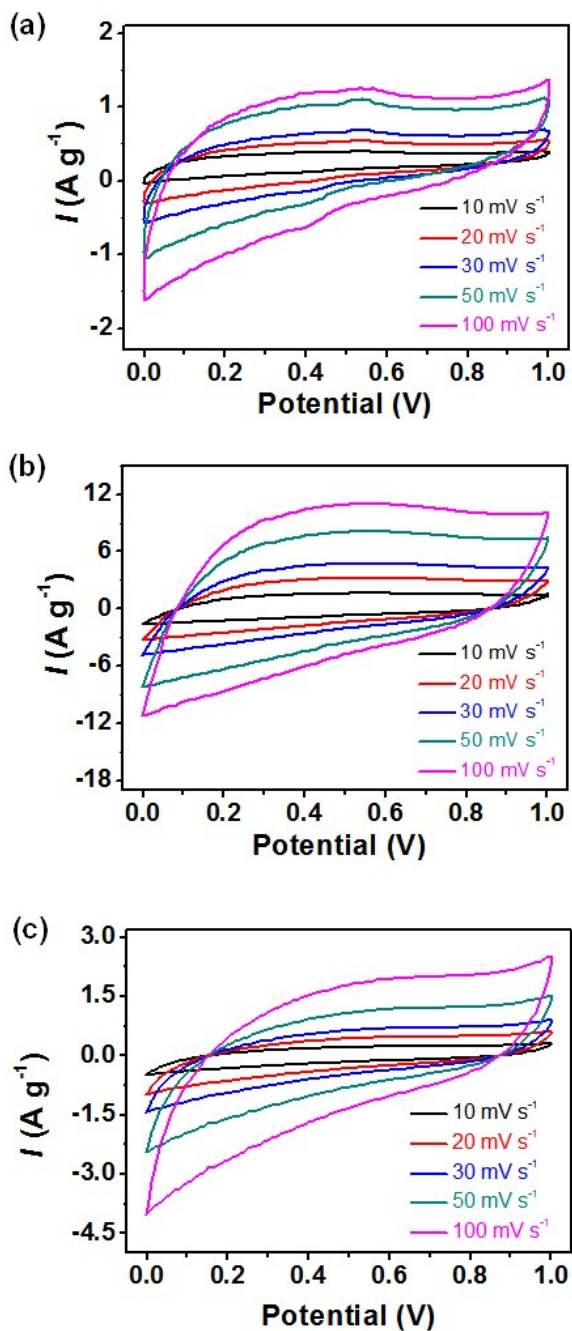

**Figure S2.** CV curves of (a) PCNT\_1, (b) PCNT\_2, and (c) PCNT\_3 with different voltage scan rates ( $10 - 100 \text{ mV s}^{-1}$ ).

### 3. Galvanostatic charge/discharge curves of other PCNTs.

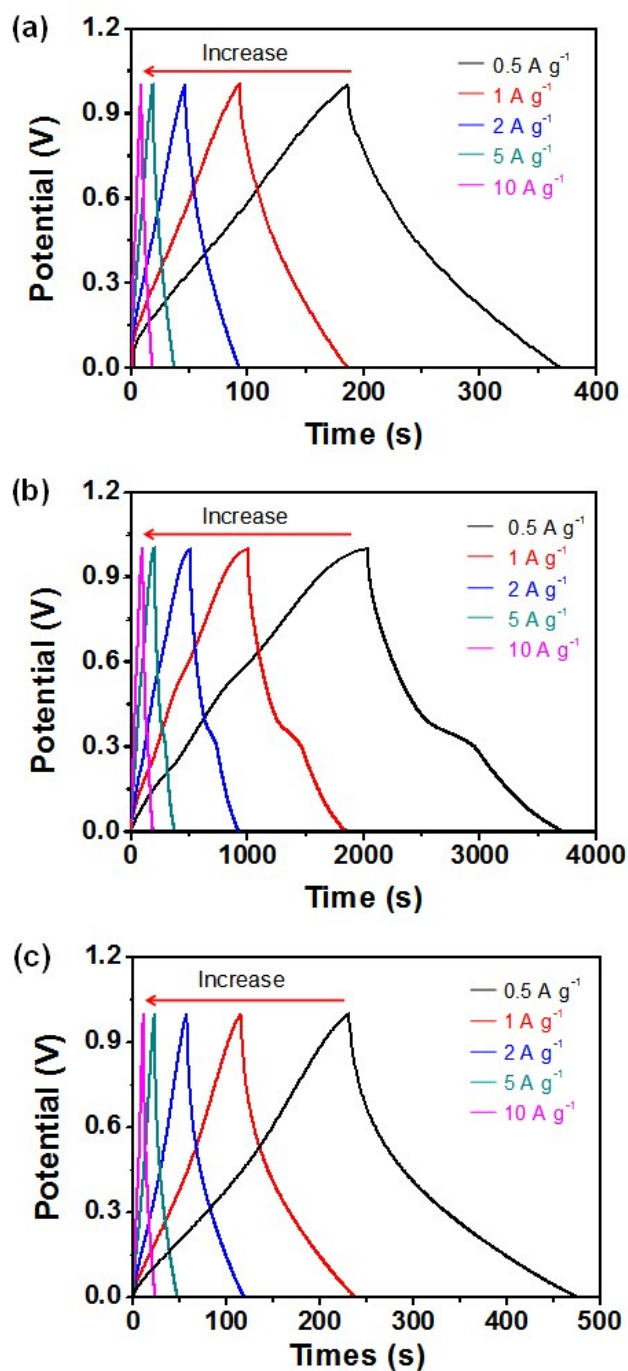

**Figure S3.** Gavanostatic charge/discharge curves of (a) PCNT\_1, (b) PCNT\_2, and (c) PCNT\_3 with different current densities (0.5 – 10 A g<sup>-1</sup>).
